# Supplementary material
Source: publisher site journal article supplement (https://www.dovepress.com/article/222049)
Supplement: Supplementary file 1 [file get_supplementary_file.php]

**Supplementary table 1.** Cause-specific mortality by sleep duration (hours/night).

| Sleep duration (hours/night) | N      | Mean age (SD) | Median age and age distribution | Median age and age distribution of deaths | Cause of death                |               |                |              |
|------------------------------|--------|---------------|---------------------------------|-------------------------------------------|-------------------------------|---------------|----------------|--------------|
|                              |        |               |                                 |                                           | Cardiovascular disease, n (%) | Cancer, n (%) | Suicide, n (%) | Other, n (%) |
| Total                        | 39,139 | 50.5 (15.7)   | 51.9 (18-94)                    | 81.6 (21-104)                             | 2,254 (5.8)                   | 2,654 (6.8)   | 66 (0.2)       | 1,763 (4.5)  |
| <5                           | 1238   | 57.6 (17.1)   | 61.8 (18-90)                    | 84.2 (41-102)                             | 173 (14)                      | 145 (12)      | 5 (0.4)        | 134 (11)     |
| 5                            | 1980   | 53.2 (15.8)   | 55.0 (18-93)                    | 83.7 (25-99)                              | 166 (8.4)                     | 124 (6.3)     | 3 (0.2)        | 126 (6.4)    |
| 6                            | 9181   | 50.4 (15.1)   | 51.6 (18-92)                    | 81.0 (21-102)                             | 476 (5.2)                     | 563 (6.1)     | 17 (0.2)       | 398 (4.3)    |
| 7                            | 16879  | 49.6 (14.9)   | 50.9 (18-91)                    | 80.5 (23-103)                             | 786 (4.7)                     | 1,062 (6.3)   | 23 (0.1)       | 609 (3.6)    |
| 8                            | 8980   | 50.6 (16.8)   | 52.7 (18-94)                    | 81.7 (23-104)                             | 562 (6.3)                     | 683 (7.6)     | 15 (0.2)       | 438 (4.9)    |
| 9-                           | 881    | 51.3 (18.8)   | 55.8 (18-93)                    | 83.4 (31-100)                             | 91 (10)                       | 77 (8.7)      | 3 (0.3)        | 58 (6.6)     |
